# Supplementary material
Source: publisher figshare collection journal article supplement (https://future-science-group.figshare.com/articles/dataset/_/21347733)
Supplement: Supplementary file 1 [file 1]

SUPPLEMENTARY MATERIAL 5

**Rater Survey**

1. I believe it is important for athletic trainers to be skilled in fiberglass cast application.
   - (1): Strongly Disagree
   - (2): Disagree
   - (3): Neutral
   - (4): Agree
   - (5): Strongly Agree
2. I believe it is important for athletic trainers to be skilled in 3D printed cast application.
   - (1): Strongly Disagree
   - (2): Disagree
   - (3): Neutral
   - (4): Agree
   - (5): Strongly Agree
3. I believe that I can confidently apply a short arm fiberglass cast.
   - (1): Strongly Disagree
   - (2): Disagree
   - (3): Neutral
   - (4): Agree
   - (5): Strongly Agree
4. I believe that I can confidently apply a short arm 3D printed cast.
   - (1): Strongly Disagree
   - (2): Disagree
   - (3): Neutral
   - (4): Agree
   - (5): Strongly Agree
5. I believe that it was easier to apply a 3D printed cast than a fiberglass cast.
   - (1): Strongly Disagree
   - (2): Disagree
   - (3): Neutral
   - (4): Agree
   - (5): Strongly Agree

INITIALS:______________ DATE:__________YEARS of Athletic Training Experience:_____

TIME OF APPLICATION (FG): _________ (3D): ___________
